# Supplementary material
Source: PubMed Central journal article supplement (PMC5564288)
Supplement: NIHMS887291-supplement-Supplemental_Materials.pdf [file NIHMS887291-supplement-Supplemental_Materials.pdf]

Supplementary Materials for  
**Essential roles of AMPA receptor GluA1 phosphorylation and  
presynaptic HCN channels in fast-acting antidepressant responses of  
ketamine**

Ke Zhang, Ting Xu, Zhongmin Yuan, Zhisheng Wei, Vitor Nagai Yamaki,  
Mingfa Huang, Richard L Huganir, Xiang Cai\*

\*Corresponding author. Email: cai001@siu.edu

Published 13 December 2016, *Sci. Signal.* **9**, ra123 (2016)  
DOI: 10.1126/scisignal.aai7884

**This PDF file includes:**

Fig. S1. Blocking postsynaptic NMDARs does not occlude ketamine-induced potentiation of SC-CA1 synaptic transmission.

Fig. S2. HCN1 channels are expressed on presynaptic active zone in stratum radiatum of CA1.

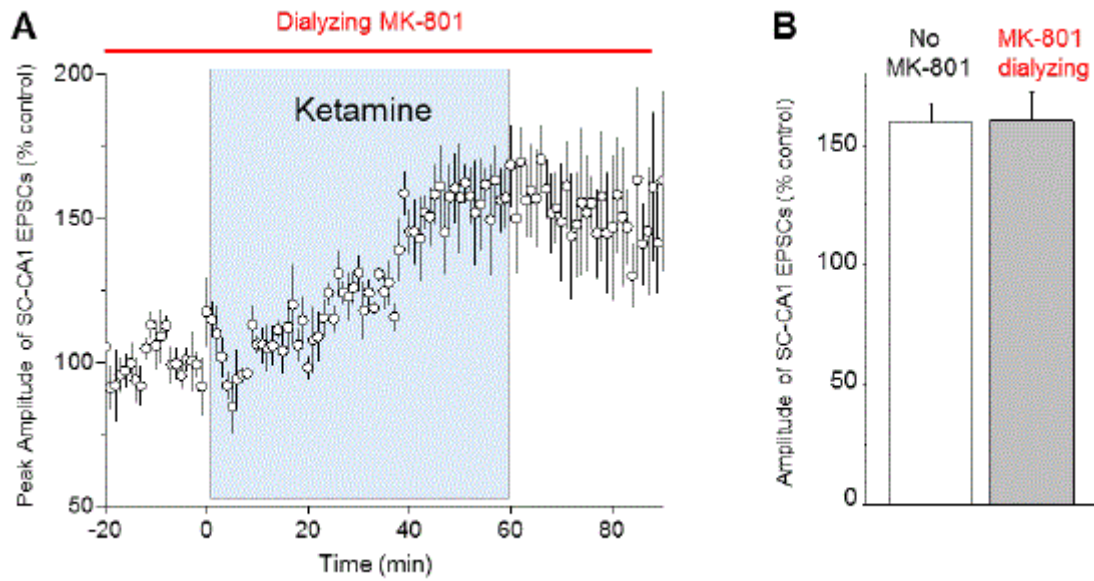

**Fig. S1. Blocking postsynaptic NMDARs does not occlude ketamine-induced potentiation of SC-CA1 synaptic transmission.** (A) Time course of SC-CA1 EPSCs shows that blocking NMDA receptors on postsynaptic CA1 cells by dialyzing MK-801 (1 mM) did not occlude the effect of ketamine on SC-CA1 EPSCs in hippocampal slices. (B) Data summary (MK-801 in pipette:  $159.3 \pm 11.9\%$  of before ketamine,  $n=4$  cells; control internal solution:  $157.2 \pm 6.1\%$ ,  $n=11$  cells).

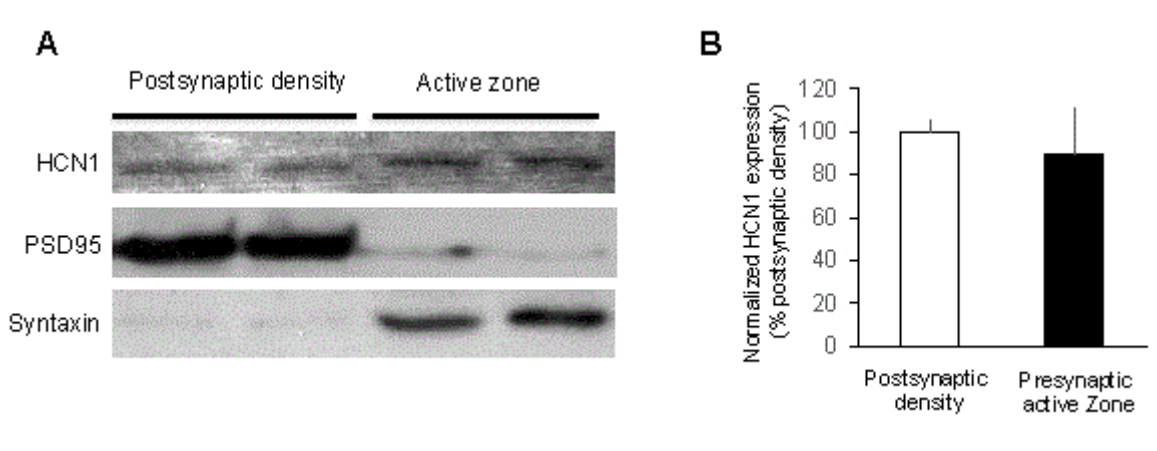

**Fig. S2. HCN1 channels are expressed on presynaptic active zone in stratum radiatum of CA1.** **Left:** presynaptic active zone and postsynaptic density were separated from synaptosome with solubilization buffer at pH=8.0. The representative blots from three Western blot experiments show HCN1 subunit-containing HCN channels are present both at presynaptic active zone and at postsynaptic density. **Right:** Data summary of three independent Western blot experiments.
